# Supplementary material
Source: PubMed Central journal article supplement (PMC7474961)
Supplement: mmc1.pdf [file mmc1.pdf]

## Supplementary Online Content

### **This online supplement includes:**

eTable 1. State-specific parameter values and corresponding references with gray numbers for abortion type indicating use of national average from 2017 (most recent date available)

eTable 2. Percent difference in estimated in-clinic contacts under the state's current medically unnecessary abortion restrictions (Baseline Scenario, Table 2) vs. under conditions in which medically unnecessary restrictions are repealed and all clinicians offer telemedicine abortion to all eligible patients with certain last menstrual period (Scenario B, Certain LMP Dating Practice)

Supplemental Reference List

**eTable 1: State-specific parameter values and corresponding references with gray numbers for abortion type indicating use of national average from 2017 (most recent date available)**

| State                | Number of Abortions (2018 monthly average) | Surgical | Medical | Supplemental Reference(s) |
|----------------------|--------------------------------------------|----------|---------|---------------------------|
| Alabama *^           | 505                                        | 71.0%    | 29.0%   | 1                         |
| Alaska               | 107                                        | 71.6%    | 28.4%   | 2                         |
| Arizona +*^          | 1037                                       | 59.8%    | 40.2%   | 3                         |
| Arkansas +*          | 256                                        | 68.1%    | 31.9%   | 4                         |
| California           | 11057                                      | 61.0%    | 39.0%   | 5                         |
| Colorado             | 748                                        | 48.4%    | 51.6%   | 6                         |
| Connecticut          | 993                                        | 61.0%    | 39.0%   | 5                         |
| Delaware             | 145                                        | 52.2%    | 47.8%   | 7                         |
| District of Columbia | 469                                        | 61.0%    | 39.0%   | 5                         |
| Florida ^            | 5853                                       | 61.0%    | 39.0%   | 5, 8                      |
| Georgia              | 3028                                       | 61.0%    | 39.0%   | 5                         |
| Hawaii               | 267                                        | 61.0%    | 39.0%   | 5                         |
| Idaho                | 108                                        | 61.0%    | 39.0%   | 5                         |
| Illinois             | 3537                                       | 61.0%    | 39.0%   | 5, 9                      |
| Indiana +*^          | 670                                        | 59.0%    | 41.0%   | 10                        |
| Iowa ^               | 237                                        | 31.7%    | 68.3%   | 11                        |
| Kansas ^             | 587                                        | 38.5%    | 61.4%   | 12                        |
| Kentucky +*          | 267                                        | 51.6%    | 48.4%   | 13                        |
| Louisiana +*^        | 675                                        | 61.0%    | 39.0%   | 5, 14                     |
| Maine                | 162                                        | 53.8%    | 46.2%   | 15                        |
| Maryland             | 2483                                       | 61.0%    | 39.0%   | 5                         |
| Massachusetts        | 1521                                       | 60.2%    | 39.8%   | 16                        |
| Michigan             | 2130                                       | 61.8%    | 38.3%   | 17                        |
| Minnesota            | 826                                        | 62.9%    | 37.1%   | 18                        |
| Mississippi +*^      | 213                                        | 61.0%    | 39.0%   | 5                         |
| Missouri +*          | 243                                        | 87.7%    | 12.3%   | 19                        |
| Montana              | 140                                        | 44.3%    | 55.7%   | 20                        |
| Nebraska *           | 173                                        | 41.0%    | 59.0%   | 21                        |
| Nevada               | 808                                        | 61.0%    | 39.0%   | 5                         |
| New Hampshire        | 184                                        | 61.0%    | 39.0%   | 5                         |
| New Jersey           | 4009                                       | 61.0%    | 39.0%   | 5                         |
| New Mexico           | 385                                        | 61.0%    | 39.0%   | 5                         |
| New York             | 6484                                       | 70.9%    | 29.1%   | 22                        |
| North Carolina *     | 2298                                       | 56.1%    | 43.9%   | 23, 24                    |
| North Dakota *       | 95                                         | 72.3%    | 27.7%   | 25                        |
| Ohio +               | 1702                                       | 69.7%    | 30.3%   | 26                        |
| Oklahoma *           | 418                                        | 47.4%    | 52.6%   | 27                        |
| Oregon               | 709                                        | 56.6%    | 43.4%   | 28                        |
| Pennsylvania         | 2530                                       | 58.9%    | 41.1%   | 29                        |
| Rhode Island         | 292                                        | 61.0%    | 39.0%   | 5                         |
| South Carolina *     | 387                                        | 44.5%    | 55.5%   | 30                        |
| South Dakota +*      | 32                                         | 64.4%    | 35.6%   | 31                        |
| Tennessee +*         | 1012                                       | 61.0%    | 39.0%   | 5                         |
| Texas +*^            | 4440                                       | 68.0%    | 32.0%   | 32                        |
| Utah +               | 244                                        | 57.4%    | 42.6%   | 33                        |
| Vermont              | 100                                        | 46.9%    | 53.1%   | 34                        |
| Virginia +^          | 1434                                       | 61.0%    | 39.0%   | 5                         |

| State           | Number of Abortions (2018 monthly average) | Surgical | Medical | Supplemental Reference(s) |
|-----------------|--------------------------------------------|----------|---------|---------------------------|
| Washington      | 1478                                       | 61.0%    | 39.0%   | 5                         |
| West Virginia * | 119                                        | 61.0%    | 39.0%   | 5                         |
| Wisconsin +*^   | 519                                        | 72.0%    | 29.0%   | 35                        |
| Wyoming         | 12                                         | 61.0%    | 39.0%   | 5                         |

+ state has in-person separate counseling visit mandate

\* state has physician dispensing law

^ state has required ultrasound law

**eTable 2. Percent difference in estimated in-clinic contacts under the state’s current medically unnecessary abortion restrictions (Baseline Scenario, Table 2) vs. under conditions in which medically unnecessary restrictions are repealed and all clinicians offer telemedicine abortion to all eligible patients with certain last menstrual period (Scenario B, Certain LMP Dating Practice)**

| State                | Percent difference |
|----------------------|--------------------|
| Alabama              | 17.8               |
| Alaska               | 16.8               |
| Arizona              | 56.3               |
| Arkansas             | 52.7               |
| California           | 24.3               |
| Colorado             | 32.8               |
| Connecticut          | 24.3               |
| Delaware             | 30.2               |
| District of Columbia | 24.0               |
| Florida              | 27.7               |
| Georgia              | 24.3               |
| Hawaii               | 24.2               |
| Idaho                | 24.2               |
| Illinois             | 24.3               |
| Indiana              | 56.6               |
| Iowa                 | 44.5               |
| Kansas               | 39.8               |
| Kentucky             | 59.7               |
| Louisiana            | 55.9               |
| Maine                | 29.0               |
| Maryland             | 24.3               |
| Massachusetts        | 24.8               |
| Michigan             | 23.8               |
| Minnesota            | 23.1               |
| Mississippi          | 55.6               |
| Missouri             | 44.7               |
| Montana              | 35.5               |
| Nebraska             | 38.0               |
| Nevada               | 24.4               |
| New Hampshire        | 24.0               |
| New Jersey           | 24.3               |
| New Mexico           | 24.1               |
| New York             | 17.8               |
| North Carolina       | 27.6               |
| North Dakota         | 16.6               |

| State          | Percent difference |
|----------------|--------------------|
| Ohio           | 52.2               |
| Oklahoma       | 33.4               |
| Oregon         | 27.2               |
| Pennsylvania   | 25.6               |
| Rhode Island   | 24.1               |
| South Carolina | 35.5               |
| South Dakota   | 53.8               |
| Tennessee      | 55.7               |
| Texas          | 52.9               |
| Utah           | 57.1               |
| Vermont        | 34.0               |
| Virginia       | 55.9               |
| Washington     | 24.4               |
| West Virginia  | 24.1               |
| Wisconsin      | 51.3               |
| Wyoming        | 19.6               |

## References

1. Alabama Department of Health, Division of Statistical Analysis. Induced Termination of Pregnancy Statistics 2017. [http://www.alabamapublichealth.gov/healthstats/assets/ITOP\\_2017AL%20.pdf](http://www.alabamapublichealth.gov/healthstats/assets/ITOP_2017AL%20.pdf). Published 2018. Accessed April 14, 2020.
2. Alaska Department of Health and Social Services, Division of Public Health, Health Analytics and Vital Records Section. 2018 Alaska Induced Termination of Pregnancy Statistics. <http://dhss.alaska.gov/dph/VitalStats/Documents/PDFs/itop/2018%20Alaska%20ITOP%20Statistics%20V0.4.2.pdf>. Published February 2019. Accessed April 14, 2020.
3. Arizona Department of Health Services. Abortions in Arizona, 2018 Abortion Report. <https://azdhs.gov/documents/preparedness/public-health-statistics/abortions/2018-arizona-abortion-report.pdf>. Published September 2019. Accessed April 14, 2020.
4. Arkansas Department of Health, Center for Health Statistics. 2018 Induced Termination of Pregnancy Report. [https://www.healthy.arkansas.gov/images/uploads/pdf/2018\\_ITOP\\_Reports.pdf](https://www.healthy.arkansas.gov/images/uploads/pdf/2018_ITOP_Reports.pdf). Published May 2019. Accessed April 14, 2020.
5. Jones RK, Witwer E, Jerman J. Abortion Incidence and Service Availability in the United States, 2017. Guttmacher Institute. <https://www.guttmacher.org/report/abortion-incidence-service-availability-us-2017>. Published September 2019. Accessed April 14, 2020.
6. Colorado Department of Public Health and Environment, Vital Statistics Program. Reported Induced Terminations of Pregnancy, 2018 Summary. <https://www.colorado.gov/pacific/cdphe/vital-statistics-program>. Published 2019. Accessed April 14, 2020.
7. Delaware Department of Health and Social Services, Division of Public Health. Delaware Vital Statistics Annual Report 2018. [https://www.dhss.delaware.gov/dph/hp/files/ar2018\\_net.pdf](https://www.dhss.delaware.gov/dph/hp/files/ar2018_net.pdf). Published February 2020. Accessed April 14, 2020.
8. Florida Agency for Healthcare Administration. Reported Induced Terminations of Pregnancy (ITOP) by Reason, by Trimester, 2018. [https://ahca.myflorida.com/MCHQ/Central\\_Services/Training\\_Support/docs/TotalsByCounty\\_2018.pdf](https://ahca.myflorida.com/MCHQ/Central_Services/Training_Support/docs/TotalsByCounty_2018.pdf). Published August 2019. Accessed April 14, 2020.
9. Illinois Department of Public Health. Illinois Abortion Statistics 2018. <http://www.dph.illinois.gov/sites/default/files/publications/illinois-abortion-statistics-2018.pdf>. Published January 2020. Accessed April 14, 2020.
10. Indiana State Department of Health, Division of Vital Records. Terminated Pregnancy Report, 2018. <https://www.in.gov/isdh/files/2018%20Indiana%20Terminated%20Pregnancy%20Report.pdf>. Published June 2019. Accessed April 14, 2020.

11. Iowa Department of Public Health, Bureau of Health Statistics. 2018 Vital Statistics of Iowa. [https://idph.iowa.gov/Portals/1/userfiles/68/HealthStats/vital\\_stats\\_2018-20191216.pdf#page=145](https://idph.iowa.gov/Portals/1/userfiles/68/HealthStats/vital_stats_2018-20191216.pdf#page=145). Published December 2019. Accessed April 14, 2020.
12. Kansas Department of Health and Environment, Bureau of Epidemiology and Public Health Informatics. Total Reported Abortions by Selected Characteristics by Age-Group of Patient, Kansas, 2018. [https://www.kdheks.gov/phi/AS\\_Tables/AS\\_2018.htm?panel=4#accordion](https://www.kdheks.gov/phi/AS_Tables/AS_2018.htm?panel=4#accordion). Published November 2019. Accessed April 14, 2020
13. Kentucky Department for Public Health, Division of Epidemiology and Health Planning, Vital Statistics Branch. 2018 Kentucky Abortion Annual Report. <https://chfs.ky.gov/agencies/dph/dehp/vsb/Forms/2018KYAbortionAnnualReport.pdf>. Published 2019. Accessed April 14, 2020
14. Louisiana Department of Health, Bureau of Vital Records and Statistics. Induced Termination of Pregnancy by Weeks of Gestation and Type of Procedure Reported Occurring in Louisiana, 2018. <http://ldh.la.gov/index.cfm/page/709>. Published 2019. Accessed April 14, 2020
15. Maine Department of Health and Human Services, Maine Center for Disease Control and Prevention, Data, Research, and Vital Statistics. 2018 Induced Abortion Tables. [https://www.maine.gov/dhhs/mecdc/public-health-systems/data-research/data/documents/pdf/ABO2018\\_AllTables.pdf](https://www.maine.gov/dhhs/mecdc/public-health-systems/data-research/data/documents/pdf/ABO2018_AllTables.pdf). Published August 2019. Accessed April 14, 2020
16. Massachusetts Department of Public Health, Registry of Vital Records and Statistics, Abortions by Procedure, 2018. Published 2019. Accessed April 14, 2020
17. Michigan Department of Health and Human Services, Division for Vital Records and Health Statistics. Induced Abortions in Michigan, 2018. <http://www.mdch.state.mi.us/pha/osr/annuals/Abortion%202018.pdf>. Published June 2019. Accessed April 14, 2020
18. Minnesota Department of Health, Center for Health Statistics. Induced Abortions in Minnesota, January - December 2018: Report to the Legislature. <https://www.health.state.mn.us/data/mchs/pubs/abrpt/docs/2018abrpt.pdf>. Published July 2019. Accessed April 14, 2020
19. Missouri Department of Health and Senior Services, Section of Epidemiology for Public Health Practice, Bureau of Epidemiology and Vital Statistics. Missouri Vital Statistics 2018. <https://health.mo.gov/data/vitalstatistics/mvs18/2018MissouriVitalStatistics.pdf#page=58>. Published November 2019. Accessed April 14, 2020
20. Montana Department of Public Health and Human Services, Public Health and Safety Division, Office of Epidemiology and Scientific Support. 2018 Montana Vital Statistics. [https://dphhs.mt.gov/Portals/85/publichealth/documents/Epidemiology/VSU/VSU\\_2018\\_Annual\\_Report.pdf](https://dphhs.mt.gov/Portals/85/publichealth/documents/Epidemiology/VSU/VSU_2018_Annual_Report.pdf). Published December 2019. Accessed April 14, 2020.
21. Nebraska Department of Health & Human Services. Nebraska 2018 Statistical Report of Abortions. <http://dhhs.ne.gov/Abortion%20Reports/2018%20Statistical%20Report%20of%20Abortions.pdf>. Published May 2019. Accessed April 14, 2020.
22. New York State Department of Health. Vital Statistics of New York State 2017. [https://www.health.ny.gov/statistics/vital\\_statistics/2017/#abor](https://www.health.ny.gov/statistics/vital_statistics/2017/#abor). Published 2019. Accessed April 14, 2020.
23. N.C. Department of Health and Human Services, Division of Public Health, State Center for Health Statistics. 2018 North Carolina Reported Induced Abortions by County of Occurrence and Residence. <https://schs.dph.ncdhhs.gov/data/vital/pregnancies/2018/reportedabortionscounty.pdf>. Published 2019. Accessed April 14, 2020.
24. N.C. Department of Health and Human Services, Division of Public Health, State Center for Health Statistics. NC Resident Abortions: Characteristics of Women Receiving Abortions North Carolina Residents, 2009 – 2018. <https://schs.dph.ncdhhs.gov/data/vital/pregnancies/2018/abortioncharacteristics.pdf>. Published 2019. Accessed April 14, 2020.
25. North Dakota Department of Health, Division of Vital Records. North Dakota Occurrence Induced Termination of Pregnancy Data 2018. <https://www.health.nd.gov/sites/www/files/documents/Files/Vital/ITOP%202018.pdf>. Published 2019. Accessed April 14, 2020.
26. Ohio Department of Health, Statistical Analysis Unit, Bureau of Vital Statistics. Induced Abortions in Ohio, 2018. <https://odh.ohio.gov/wps/wcm/connect/gov/534ddb3a-febd-4e2a-99ee-90249240bcdd/VS->

- AbortionReport2018.pdf.pdf?MOD=AJPERES&CONVERT\_TO=url&CACHEID=ROOTWORKSPACE.Z18\_M1HGGIK0N0JO00QO9DDDDM3000-534ddb3a-febd-4e2a-99ee-90249240bcdd-mS77yg-. Published September 2019. Accessed April 14, 2020
27. Oklahoma State Department of Health. Abortion Surveillance in Oklahoma 2002-2018 Summary Report. <https://www.ok.gov/health2/documents/2018%20ITOP%20Report.pdf>. Published 2019. Accessed April 14, 2020.
  28. Oregon Health Authority, Center for Health Statistics. Oregon Vital Statistics Annual Report, 2017. <https://www.oregon.gov/oha/PH/BIRTHDEATHCERTIFICATES/VITALSTATISTICS/ANNUALREPORTS/VOLUME1/Documents/2017/2017VitalStatsVolume1.pdf>. Published January 2019. Accessed April 14, 2020.
  29. Pennsylvania Department of Health. 2018 Abortion Statistics Executive Summary. [https://www.health.pa.gov/topics/HealthStatistics/VitalStatistics/Documents/Pennsylvania\\_Annual\\_Abortion\\_Report\\_2018.pdf](https://www.health.pa.gov/topics/HealthStatistics/VitalStatistics/Documents/Pennsylvania_Annual_Abortion_Report_2018.pdf). Published December 2019. Accessed April 14, 2020.
  30. South Carolina Department of Health and Environment Control, Vital Statistics. A Public Report Providing Statistics Compiled from all Abortions Reported to DHEC. <https://www.scdhec.gov/sites/default/files/media/document/2018-SC-Abortion-Report.pdf>. Published 2019. Accessed April 14, 2020.
  31. South Dakota Department of Health, Office of Vital Statistics. South Dakota 2018 Report of Induced Abortions. [https://doh.sd.gov/documents/statistics/AbortionReport\\_2018.pdf](https://doh.sd.gov/documents/statistics/AbortionReport_2018.pdf). Published June 2019. Accessed April 14, 2020
  32. Texas Department of State Health, Texas Health and Human Services Commission, Center for Analytics and Decision Support. Induced Terminations of Pregnancy by Procedure and Facility - 2017. <https://hhs.texas.gov/about-hhs/records-statistics/data-statistics/itop-statistics>. Published 2019. Accessed April 14, 2020.
  33. Utah Department of Health, Center for Health Data and Informatics, Office of Vital Records and Statistics. Utah Vital Statistics Abortions 2017. <https://vitalrecords.utah.gov/wp-content/uploads/Abortions-2017-Utah-Vital-Statistics.pdf>. Published January 2019. Accessed April 14, 2020.
  34. Vermont Department of Health, Agency of Human Services. Vermont Vital Statistics Annual Report, 2017. <https://www.healthvermont.gov/sites/default/files/documents/pdf/Vital%20Statistics%20Bulletin%202017.pdf>. Published October 2019. Accessed April 14, 2020.
  35. Wisconsin Department of Health Services, Division of Public Health, Office of Health Informatics. Reported Induced Abortions in Wisconsin, 2018. <https://www.dhs.wisconsin.gov/publications/p45360-18.pdf>. Published February 2020. Accessed April 14, 2020.
